# Supplementary material for: Experiences with counselling to people who wish to be able to self-determine the timing and manner of one’s own end of life: a qualitative in-depth interview study
Source: PubMed Central journal article supplement — J Med Ethics. 2019 Dec 23;47(1):39–46. doi: 10.1136/medethics-2019-105564 (PMC7803911; doi:10.1136/medethics-2019-105564), 2019-12-23
Supplement: medethics-2019-105564supp001.pdf [file medethics-2019-105564supp001.pdf]

## **APPENDIX 1 TOPIC LIST FOR IN-DEPTH INTERVIEW**

### *Introduction*

Information on goal of study, informed consent and recording of interview

### *Opening question*

What has been the motivation to contact foundation De Einder?

### *Personal characteristics*

Factual background information, and the evaluation by participant (e.g. age, gender, family situation, social network, work, hobbies)

### *Motivation to choose for counselling for Non-PAD*

Motivation to contact counsellor

Experiences, beliefs, opinions, values relating to contacting the counsellor

Communication with general practitioner (GP) about death wish and/or request PAD

### *Health situation*

Current health situation and experienced seriousness,

Prior and available treatments for (current) health problems

Mastery: Experience of influence over own situation (current health) and prospective death

Suicidal thoughts (current and past) and suicidal attempts

### *Counselling*

Expectations, evaluation, and result of counselling

Content of counselling (duration, frequency, involvement of others)

### *Judicial situation*

Effects of Article 294 Penal Code, PAD law, law on narcotics.

### *Possible death*

Plans for / opinion about timing and manner of own death
