# Supplementary material for: Experiences with counselling to people who wish to be able to self-determine the timing and manner of one’s own end of life: a qualitative in-depth interview study
Source: PubMed Central journal article supplement — J Med Ethics. 2019 Dec 23;47(1):39–46. doi: 10.1136/medethics-2019-105564 (PMC7803911; doi:10.1136/medethics-2019-105564), 2019-12-23
Supplement: medethics-2019-105564supp002.pdf [file medethics-2019-105564supp002.pdf]

## APPENDIX 2 CODE LIST

Codes that were made in the analysis of the content of and experiences with the counselling from a counsellor facilitated by De Einder.

| Supercodes                       | Codes                                     | Subcodes                                                                                                                            |
|----------------------------------|-------------------------------------------|-------------------------------------------------------------------------------------------------------------------------------------|
| V Expectations about counselling | V10 Practical design counselling          |                                                                                                                                     |
|                                  | V20 Counsellor                            | Knowledge, character, position, relation                                                                                            |
|                                  | V30 Counselling                           |                                                                                                                                     |
|                                  | V40 Mental processes                      | Self determination, researching death wish, seeking reassurance                                                                     |
|                                  | V50 Practical self-euthanasia general     |                                                                                                                                     |
|                                  | V51 Practical self-euthanasia medication  |                                                                                                                                     |
|                                  | V60 Juridical                             |                                                                                                                                     |
|                                  | V70 Close ones / Others involved          | Prevent burdening close ones, physician                                                                                             |
|                                  | V80 Medical assistance                    |                                                                                                                                     |
|                                  | V90 Other expectations                    |                                                                                                                                     |
| E Content of counselling         | E10 Practical design counselling          | Period, frequency, duration, means of communication, content, costs, location, involvement others, initiative, reports, assignments |
|                                  | E20 Counsellor                            |                                                                                                                                     |
|                                  | E30 Counselling                           | Focus medication, focus mental counselling, listening no taboo                                                                      |
|                                  | E40 Mental processes                      | Death wish, help in life                                                                                                            |
|                                  | E50 Practical self-euthanasia general     | Methods, preparation, performance                                                                                                   |
|                                  | E51 Practical self-euthanasia medication  | Which medication, efficacy, dosage, intake, interaction, obtaining, quality and shelf life, performance                             |
|                                  | E55 Practical self-euthanasia STED        |                                                                                                                                     |
|                                  | E56 Practical self-euthanasia plastic bag |                                                                                                                                     |
|                                  | E57 Practical self-euthanasia helium      |                                                                                                                                     |
|                                  | E58 Practical self-euthanasia after death |                                                                                                                                     |
|                                  | E60 Juridical                             |                                                                                                                                     |
|                                  | E70 Close ones / Others involved          | Assistance from others, safeguarding others<br>About others (psychological), about others (juridical), counselling of others        |
|                                  | E80 Medical assistance                    | PAD, living wills                                                                                                                   |
| E90 Other content                |                                           |                                                                                                                                     |
| R Results after counselling      | R10 Practical design counselling          |                                                                                                                                     |
|                                  | R20 Counsellor                            | Listening ear, respect, count on, trust, relation, other positive results, other negative results.                                  |
|                                  | R30 Counselling                           | Listening without taboo, appointments design, attitude, other positive, other negative                                              |
|                                  | R40 Mental processes                      | Process: if ending own life, Process: when ending own life, Process: ending life together                                           |
|                                  | R50 Practical self-euthanasia general     | Preference method                                                                                                                   |
|                                  | R51 Practical self-euthanasia medication  | Info medication, stage obtaining, manner obtaining, period owning medication, worry effectiveness                                   |
|                                  | R55 Practical self-euthanasia owning      | Independence, certainty, relieve, worry effectiveness                                                                               |
|                                  | R55 Practical self-euthanasia STED        |                                                                                                                                     |
|                                  | R56 Practical self-euthanasia plastic bag |                                                                                                                                     |
|                                  | R57 Practical self-euthanasia helium      |                                                                                                                                     |
|                                  | R58 Practical self-euthanasia after death |                                                                                                                                     |
|                                  | R60 Juridical                             |                                                                                                                                     |
|                                  | R70 Close ones / Others involved          | Safeguarding others, worry others<br>Preparing farewell, openness, informing others, worry about others                             |
|                                  | R80 Medical assistance                    | PAD, living wills                                                                                                                   |
|                                  | R90 Other content                         |                                                                                                                                     |
